# Supplementary material for: Adductor canal block versus femoral nerve block for pain control after total knee arthroplasty: A systematic review and Meta-analysis
Source: PubMed Central journal article supplement (PMC9410636; doi:10.1097/md.0000000000030110), 2022-08-26
Supplement: medi-101-e30110-s002.pdf [file medi-101-e30110-s002.pdf]

**Supplementary table 2:** Risk of bias assessment of cohort (prospective and retrospective) studies according to the national institute of health (NIH) quality assessment tool (Yes, No, not applicable (NA), cannot determine (CD), or not reported (NR))

| Studies             | 1. Was the research question or objective in this paper clearly stated? | 2. Was the study population clearly specified and defined? | 3. Was the participation rate of eligible persons at least 50%? | 4. Were all the subjects selected or recruited from the same or similar populations? Were inclusion and exclusion criteria for being in the study pre-specified and applied uniformly to all participants? | 5. Was a sample size justification, power description, or variance and effect estimates provided? | 6. For the analyses in this paper, were the exposure(s) of interest measured prior to the outcome(s) being measured? | 7. Was the time frame sufficient so that one could reasonably expect to see an association between exposure and outcome if it existed? | 8. For exposures that can vary in amount or level, did the study examine different levels of the exposure as related to the outcome (e.g., categories of exposure, or exposure measured as continuous variable)? | 9. Were the exposure measures (independent variables) clearly defined, valid, reliable, and implemented consistently across all study participants? | 10. Was the exposure(s) assessed more than once over time? | 11. Were the outcome measures (dependent variables) clearly defined, valid, reliable, and implemented consistently across all study participants? | 12. Were the outcome assessors blinded to the exposure status of participants? | 13. Was loss to follow-up after baseline 20% or less? | 14. Were key potential confounding variables measured and adjusted statistically for their impact on the relationship between exposure(s) and outcome(s)? | Total scores: Yes = 1, No = 0.5, NR & NA & CD = 0 | Quality rating: good (14-12 point) or fair (7-11 point) or poor (6-0 points) |
|---------------------|-------------------------------------------------------------------------|------------------------------------------------------------|-----------------------------------------------------------------|------------------------------------------------------------------------------------------------------------------------------------------------------------------------------------------------------------|---------------------------------------------------------------------------------------------------|----------------------------------------------------------------------------------------------------------------------|----------------------------------------------------------------------------------------------------------------------------------------|------------------------------------------------------------------------------------------------------------------------------------------------------------------------------------------------------------------|-----------------------------------------------------------------------------------------------------------------------------------------------------|------------------------------------------------------------|---------------------------------------------------------------------------------------------------------------------------------------------------|--------------------------------------------------------------------------------|-------------------------------------------------------|-----------------------------------------------------------------------------------------------------------------------------------------------------------|---------------------------------------------------|------------------------------------------------------------------------------|
| Ludwigson et al     | Yes                                                                     | No                                                         | NA                                                              | Yes                                                                                                                                                                                                        | No                                                                                                | Yes                                                                                                                  | Yes                                                                                                                                    | No                                                                                                                                                                                                               | Yes                                                                                                                                                 | NA                                                         | Yes                                                                                                                                               | No                                                                             | Yes                                                   | No                                                                                                                                                        | 9.5                                               | fair quality                                                                 |
| seo et al           | Yes                                                                     | Yes                                                        | NA                                                              | Yes                                                                                                                                                                                                        | No                                                                                                | Yes                                                                                                                  | Yes                                                                                                                                    | No                                                                                                                                                                                                               | Yes                                                                                                                                                 | NA                                                         | Yes                                                                                                                                               | No                                                                             | Yes                                                   | No                                                                                                                                                        | 10                                                | fair quality                                                                 |
| klement et al       | Yes                                                                     | Yes                                                        | NR                                                              | Yes                                                                                                                                                                                                        | No                                                                                                | Yes                                                                                                                  | No                                                                                                                                     | No                                                                                                                                                                                                               | Yes                                                                                                                                                 | NA                                                         | Yes                                                                                                                                               | No                                                                             | Yes                                                   | Yes                                                                                                                                                       | 9.5                                               | fair quality                                                                 |
| Mudumbai et al 2013 | Yes                                                                     | Yes                                                        | Yes                                                             | Yes                                                                                                                                                                                                        | Yes                                                                                               | No                                                                                                                   | Yes                                                                                                                                    | No                                                                                                                                                                                                               | Yes                                                                                                                                                 | NA                                                         | Yes                                                                                                                                               | No                                                                             | Yes                                                   | Yes                                                                                                                                                       | 11.5                                              | Good quality                                                                 |
| patterson et al     | Yes                                                                     | Yes                                                        | Yes                                                             | Yes                                                                                                                                                                                                        | NR                                                                                                | No                                                                                                                   | No                                                                                                                                     | No                                                                                                                                                                                                               | Yes                                                                                                                                                 | NA                                                         | Yes                                                                                                                                               | No                                                                             | Yes                                                   | No                                                                                                                                                        | 9.5                                               | Fair quality                                                                 |
| mudumbai et al 2016 | Yes                                                                     | Yes                                                        | NR                                                              | Yes                                                                                                                                                                                                        | NR                                                                                                | No                                                                                                                   | No                                                                                                                                     | No                                                                                                                                                                                                               | Yes                                                                                                                                                 | NA                                                         | Yes                                                                                                                                               | No                                                                             | Yes                                                   | Yes                                                                                                                                                       | 8.5                                               | Fair quality                                                                 |
| Thacher et al       | Yes                                                                     | Yes                                                        | No                                                              | Yes                                                                                                                                                                                                        | NR                                                                                                | NR                                                                                                                   | Yes                                                                                                                                    | No                                                                                                                                                                                                               | Yes                                                                                                                                                 | NA                                                         | Yes                                                                                                                                               | No                                                                             | Yes                                                   | No                                                                                                                                                        | 9                                                 | Fair quality                                                                 |
| Ardon et al         | Yes                                                                     | Yes                                                        | Yes                                                             | Yes                                                                                                                                                                                                        | Yes                                                                                               | Yes                                                                                                                  | Yes                                                                                                                                    | NA                                                                                                                                                                                                               | Yes                                                                                                                                                 | NA                                                         | Yes                                                                                                                                               | No                                                                             | Yes                                                   | No                                                                                                                                                        | 11                                                | fair quality                                                                 |
| Bolarinwa et al     | Yes                                                                     | Yes                                                        | Yes                                                             | Yes                                                                                                                                                                                                        | NR                                                                                                | NR                                                                                                                   | Yes                                                                                                                                    | NA                                                                                                                                                                                                               | Yes                                                                                                                                                 | NA                                                         | Yes                                                                                                                                               | No                                                                             | Yes                                                   | No                                                                                                                                                        | 9                                                 | Fair quality                                                                 |

|                        |     |     |     |     |    |     |     |     |     |    |     |    |     |    |     |              |
|------------------------|-----|-----|-----|-----|----|-----|-----|-----|-----|----|-----|----|-----|----|-----|--------------|
| <b>Brennan et al</b>   | Yes | Yes | NR  | Yes | No | Yes | Yes | NA  | Yes | NA | Yes | No | Yes | No | 9.5 | Fair quality |
| <b>Rasmussen et al</b> | Yes | Yes | No  | Yes | No | Yes | NR  | NA  | Yes | NA | Yes | No | Yes | No | 8   | Fair quality |
| <b>thobhani et al</b>  | Yes | Yes | Yes | Yes | NR | NR  | Yes | Yes | Yes | NA | Yes | No | Yes | No | 10  | Fair quality |

NA: not applicable, NR: not reported, CD: cannot determine
