# Supplementary material for: Adductor canal block versus femoral nerve block for pain control after total knee arthroplasty: A systematic review and Meta-analysis
Source: PubMed Central journal article supplement (PMC9410636; doi:10.1097/md.0000000000030110), 2022-08-26

Supplementary figure 6: Risk of falls.

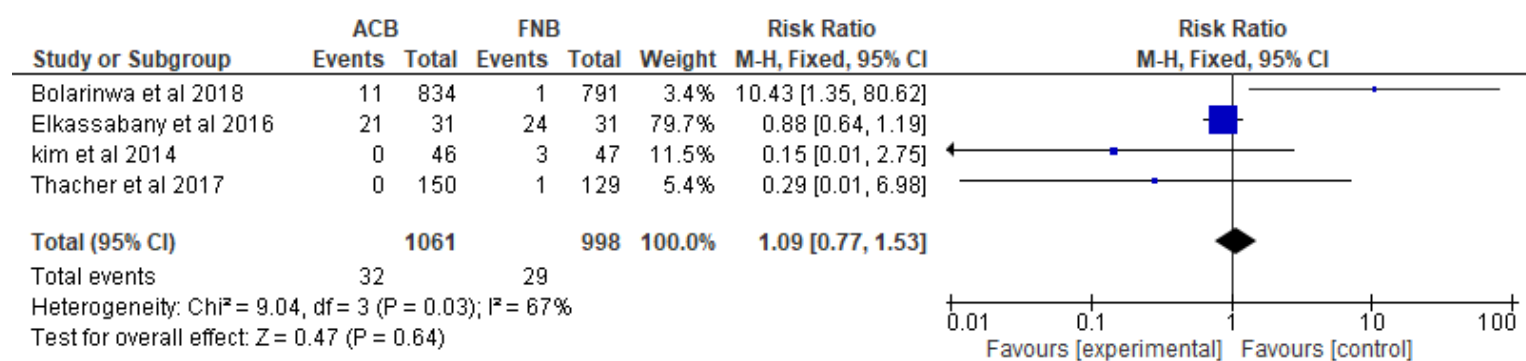

Supplement: medi-101-e30110-s008.pdf [file medi-101-e30110-s008.pdf]
